1 Activity level in left auditory cortex predicts behavioral performance in inhibition  
2 tasks in children

3

4 Sam van Bijnen<sup>\*,1,2</sup>, Lauri Parkkonen<sup>3</sup> and Tiina Parviainen<sup>1</sup>

5

6 <sup>1</sup>Centre for Interdisciplinary Brain Research, Department of Psychology, University of  
7 Jyväskylä, P.O. Box 35, FI-40014, Jyväskylä, Finland.

8 <sup>2</sup>Faculty of Science, University of Amsterdam, 1012 WX, Amsterdam, the Netherlands

9 <sup>3</sup>Department of Neuroscience and Biomedical Engineering, Aalto University School of  
10 Science, Espoo, Finland

11

12 \*corresponding author at: [sam.s.vanbijnen@jyu.fi](mailto:sam.s.vanbijnen@jyu.fi)

13 Department of Psychology

14 University of Jyväskylä

15 Kärki, Mattilanniemi 6

16 FI-40014 Jyväskylän yliopisto, Finland

17

18 Declarations of interest: none

19 **Abstract**

20 *Sensory processing during development is important for the emerging cognitive skills*  
21 *underlying goal-directed behavior. Yet, it is not known how auditory processing in children is*  
22 *related to their cognitive functions. Here, we utilized combined magneto- and*  
23 *electroencephalographic (M/EEG) measurements to show that child-unique auditory cortical*  
24 *activity at ~250 ms after auditory stimulation predicts the performance in inhibition tasks.*  
25 *While unaffected by task demands, the amplitude of the left-hemisphere response was*  
26 *significantly correlated with the variability of behavioral response time. Since this response*  
27 *is not present in adults, our results suggest divergent brain mechanisms in adults and*  
28 *children for consistent performance in auditory-based cognitive tasks. This difference can be*  
29 *explained as a shift in cognitive control functionality from sensorimotor associations in the*  
30 *auditory cortex of children to top-down regulated control processes involving (pre)frontal*  
31 *and cingulate areas in adults.*

32

33 **Keywords:** Auditory processing, MEG, EEG, inhibition, development, cognitive control

## 34 **Introduction**

35 The development of basic auditory circuits in the brain relies on everyday aural experiences.  
36 Converging evidence from studies of both typical and clinical groups has shown the importance  
37 of this type of plasticity for efficient auditory functioning (Gordenet al., 2003; Tierney et al.,  
38 2015). Auditory sensory processing during development not only enables human  
39 communication and language learning, it also plays a role in cognitive and sensorimotor aspects  
40 of behavior (Kraus et al., 2012; Siegel et al., 2015). Indeed, the effect of auditory expertise  
41 extends into cognitive functions such as attention and cognitive control that rely on auditory  
42 processing (Kraus and White-Schwoch, 2015). Presumably, an interaction between auditory,  
43 sensorimotor and cognitive processing govern the resulting phenotype of goal directed  
44 behavior (Kraus and White-Schwoch, 2015). Given the evident link between auditory and  
45 cognitive development, we have surprisingly limited understanding of how the typical  
46 development of cortical auditory responses is related to cognitive functions such as cognitive  
47 control.

48           Auditory evoked brain responses measured with electro- and  
49 magnetoencephalography (EEG/MEG) have been successfully used to study the development  
50 of the central auditory system (Paetau et al., 1995; Johnstone et al., 1996; Ponton et al., 2000;  
51 Ponton et al., 2002; Čeponienė et al., 2002; Wunderlich and Cone-Wesson, 2006) and they  
52 have been used as a marker for central auditory pathway plasticity (Sharma et al., 2002).  
53 Especially interesting from the perspective of auditory development is a sustained activation  
54 pattern approximately 250ms after auditory stimulation, as it is typically reported in a wide age  
55 range of children but not in adults.

56           In adults, the resulting waveform from auditory stimulation is a combination of  
57 transient positive and negative deflections, which were defined by their order (P1-N1-P2-N2)

58 or latency (e.g. N100) – and a lower letter “m” to indicate their MEG counterparts. In contrast,  
59 the most prominent responses in primary school children (~6–12 years) are the P1(m) at around  
60 100ms (Orekhova et al., 2013; Yoshimura et al., 2014) and a sustained activation pattern at  
61 ~250 ms (N2m/N250m) (Paetau et al., 1995; Ponton et al., 2000; Čeponienė et al., 2002;  
62 Parviainen et al., 2019). The development of the auditory neural activation is best characterized  
63 by a gradual dissociation of the earlier, more transient responses (P1/N1), and an attenuation  
64 of the later, sustained, response (N250) until it is no longer or barely present in adults (Ponton  
65 et al., 2000; Albrecht et al., 2000; Čeponienė et al., 2002; Takeshita et al., 2002; Wunderlich  
66 and Cone-Wesson, 2006). The right hemisphere seems to precede the left hemisphere in this  
67 developmental trajectory, suggesting faster maturation of the right-auditory cortex and possibly  
68 stronger experience-driven plasticity in the left than right hemisphere (Parviainen et al., 2019).

69         Developmental studies of human auditory processing have merely sketched the  
70 age-related changes in timing or strength of activation across the time-line of processing the  
71 sensory information. To go beyond the descriptive level, a fundamental question is how the  
72 development of activity in these time-windows (i.e. ~100 and 250 ms.) is functionally  
73 meaningful for the development of cognitive functions. These two time-windows seem to  
74 represent functionally distinct processes. First, they are dissociated by their developmental  
75 trajectories (Parviainen et al., 2019). Second, responses in these time-windows show different  
76 refractory periods; whereas shortening the inter stimulus interval (ISI) attenuates the earlier  
77 response pattern, the later, more sustained response is enhanced (or unaffected) (Takeshita et  
78 al., 2002; Karhu et al., 1997).

79         The child N1(m), emerging during early-mid childhood, seems to correspond  
80 relatively straightforward to the adult N1(m) (Čeponienė et al., 1998) and its role in auditory  
81 information processing is relatively well known. In short, although the N1(m) primarily reflects  
82 sensory and perceptual processing, it is also affected by (selective) attention (Hilyard et al.,

83 1973; Näätänen, 1982). In contrast, the later time-window (i.e. ~200-300ms) shows remarkable  
84 differences between adults and children. Indeed, children show an auditory evoked response  
85 (i.e. N250m) that is reported even by passive stimulation, using different sound types, and  
86 under different attentional conditions (van Bijnen et al., 2019; Parviainen et al., 2019; Albrecht  
87 et al., 2000; Takeshita et al., 2002; Johnstone et al., 1996). This response is typically absent in  
88 adults. Instead, adults consistently show a response pattern in this time-window only in active  
89 tasks and it has been implicated in executive control in the cingulate cortex (Falkenstein et al.,  
90 1999; Nieuwenhuis et al., 2003; Huster et al., 2010). Given the apparent relevance of this child-  
91 specific response for the developing brain, little is known about its role in the functional  
92 development of auditory and related cognitive networks.

93           This sustained activation pattern has been suggested to reflect increased  
94 automatization of information processing (Albrecht et al., 2000; Parviainen et al., 2011),  
95 possibly corresponding with the development of (neural) inhibitory control (Čeponienė et al.,  
96 2002) or the ability to control attention (Johnstone et al., 1996). However, direct correlational  
97 evidence comes only from language studies that have related weaker and/or contracted activity  
98 in this time window in typical developing children to a better performance on language tests  
99 (Parviainen et al. 2011; Hämäläinen et al., 2013). A direct link between (the maturation of) this  
100 sustained response and higher-order cognitive skills such as attention and inhibition has not  
101 been established.

102           In this study, we investigated the later, sustained response in the child brain. More  
103 specifically, we explored its developmental trajectory in a cross-sectional design and its  
104 sensitivity to task manipulations by varying attentional and inhibitory demands. Most  
105 importantly, to improve our understanding of its functional significance, we explored how  
106 much this response explained behavioral performance measures of inhibition and attention. In  
107 the present study, 78 typically developing children and 16 adults completed three variations of

108 a simple auditory oddball paradigm; a passive oddball task, an active oddball task (press button  
109 for deviant tone) and a Go/No-go task (press button for standard tone).

110 We combined M/EEG recordings and individual MRI's to achieve maximal  
111 sensitivity to the spatiotemporal characteristics of maturation-specific activation patterns  
112 (Sharon et al., 2007). A combination of M/EEG is uniquely suitable to extract the separate  
113 components from the time-varying activation pattern evoked by auditory stimuli, and adding  
114 individuals MRI's increases the accuracy of localizing the underlying cortical generators.  
115 Importantly for our purpose, while MEG is more sensitive to hemispheric differences, EEG  
116 provides a better account of deeper (e.g. cingulate cortex) and radial sources (Baillet, 2017;  
117 Gross, 2019).

118

## 119 **Materials and Methods**

120

### 121 *Participants*

122

123 Participants were Finnish speaking school children (6-14 years) recruited through schools and  
124 the National Registry of Finland, and Finnish speaking adults. None of the participants had  
125 neurological disorders or were on medication affecting the central nervous system. In total, 78  
126 children and 16 adults participated in this study. Of the 78 children, eleven were excluded: one  
127 did not finish the experiment and one had too many errors in the MEG task (>50% errors in at  
128 least one block, see below), five had excessive head movements or magnetic interference  
129 during MEG/MRI measurements, two objected to go in the MRI scanner, and two showed  
130 structural abnormalities in their MRI. No adults were excluded. The data included in this study

131 consisted of 67 children (mean age 10.2 years, SD: 1.4, range: 6–14, 36 boys, 31 girls) and 16  
132 adults (mean age 24.8, SD: 3.4, range: 20–30, 3 men, 13 women). Children were recruited to  
133 cover mainly the ages between 8-12 years as previous studies indicated this age range is an  
134 important developmental period for our response of interest. All participants had normal  
135 hearing as tested with an audiometer. The study was approved by the Ethics Committee of the  
136 University of Jyväskylä. An informed consent was obtained from all children and their parents,  
137 and the adults in accordance with the Declaration of Helsinki. All participants received  
138 compensation for participation (movie ticket or gift card).

139

#### 140 *Stimuli and Tasks*

141

142 Auditory stimuli consisted of a 70-ms (10–ms rise/fall time) sine wave tone with a frequency  
143 of either 1.0- (standard tone(ST); 70%) or 1.5-kHz (deviant tone(DT); 30%) at 65 dB SPL and  
144 were created with the Audacity software® (V2.3.3) (<http://audacityteam.org/>). A continuous  
145 stream of auditory stimuli was presented binaurally with an inter-stimulus interval varying  
146 between 1.6 and 2.0–s. The stream always started with the standard tone, and two deviant tones  
147 were never presented in a row. The participants completed three tasks: a passive listening task  
148 (PL), an auditory Go/No-go (GN) and an auditory oddball task (OB). The stimuli were identical  
149 in all three tasks but the instructions on how to respond were different: subjects were asked to  
150 ignore the tones (PL), press a button to ST (GN), and press the button to DT (OB). The number  
151 of stimuli was different in the PL task compared to the GN and OB: 150 stimuli/block vs. 90  
152 stimuli/block, respectively (figure 1).

153                   The stimuli were embedded in a game. We created a visual environment  
154 resembling a submarine, where the captain gave instructions to the participants “inside” the  
155 submarine (Figure 1). Visual stimuli were created by Studio Dennis Parren  
156 ([www.dennisparren.com](http://www.dennisparren.com)) and were there for the sole purpose of engaging the participants. All  
157 stimuli were controlled by PsychoPy (V3.2) (Peirce et al., 2019) running on a Linux desktop  
158 PC. Auditory stimuli were delivered to the subject through plastic tubes and earpieces using an  
159 MEG-compatible hi-fidelity sound system.

160

### 161 *Procedure*

162

163 The experiment was conducted in a child-friendly environment in which the participants were  
164 asked to help science by studying the clownfish population. Before the start of the tasks, we  
165 measured resting-state activity with two times 1.5 minutes eyes open (EO) and eyes closed  
166 (EC). Subsequently, participants were instructed by a captain through movie clips on how to  
167 perform the three auditory tasks.

168                   The first PL task started after the captain instructed the participant to ignore the  
169 tones while he would look for the clownfish. During this task, the participants watched the  
170 silent stop-motion animation series “Pingu”. After the first PL task, the captain explained that  
171 the submarine detects fish using sound (i.e., sonar) and that the captain needs help detecting  
172 them while he navigates the submarine. The participants were then told that the two tone-pips  
173 represented two types of fish (Figure 1); the clownfish (ST) and the shark (DT). First, they  
174 were asked to detect the clownfish (GN task) by pressing a button (as quickly as possible) after



175 the ST's. Participants were also instructed to look in the middle of the window (Figure 1) and  
176 focus on the sounds.

177 Twelve practice trials preceded the actual measurement to check whether the  
178 participants understood the task. Subsequently, in the OB task they were asked to detect the  
179 sharks by pressing a button whenever the DT was presented in order to protect the clownfish.  
180 Again, twelve practice trials were included to check whether the participants understood the  
181 task. Finally, two blocks of the GN task and OB task, each consisting of 90 trials (27 DT/63  
182 ST), were completed alternately before the break. During the break, we offered participants a  
183 snack and drink and a possibility to stretch their legs. After the break, participants completed  
184 the same blocks again starting with the PL task followed by two blocks of alternating GN and  
185 OB tasks. The complete procedure is shown in Figure 1.

186

187

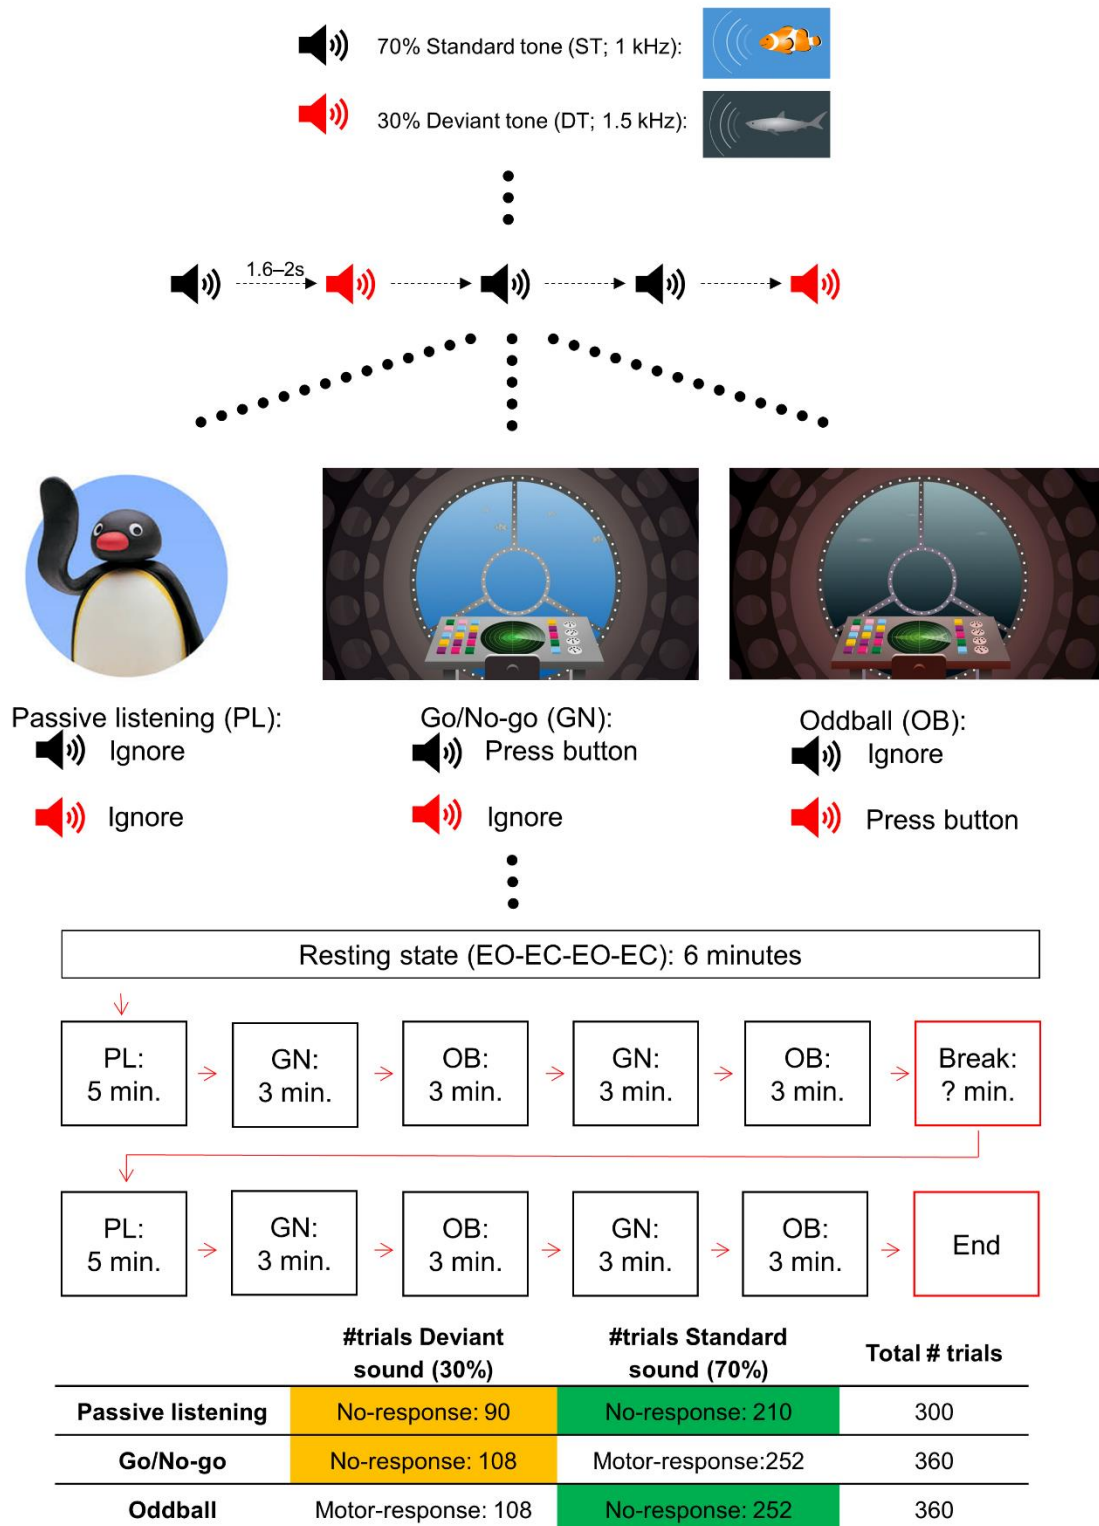

188

189 **Figure 1.** Experimental design and procedure. Statistical contrasts of interest marked in yellow/green

190 (bottom table).

191 *M/EEG and MRI*

192

193 The brain responses were recorded using a 306-channel MEG system and the integrated EEG  
194 system (Elekta Neuromag® TRIUX™, MEGIN Oy, Helsinki, Finland). M/EEG data were  
195 filtered to 0.1–330 Hz and sampled at 1000 Hz. EEG recordings were performed with a 32-  
196 channel cap and referenced online to an electrode on the right earlobe. Vertical and horizontal  
197 electrooculograms (EOG) were measured to capture eye movements and blinks for offline  
198 artifact suppression. EOG electrodes were placed directly below and above the right eye and  
199 on the outer canthi of each eye, and a common ground electrode was attached to the collarbone.

200           Five digitized head position indicator (HPI) coils were placed on the EEG cap to  
201 continuously monitor the head position in relation to the sensors of the MEG helmet. The EEG  
202 electrodes and HPI coils were digitized relative to three anatomic landmarks (nasion, left and  
203 right preauricular points) using the Polhemus Isotrak digital tracker system (Polhemus,  
204 Colchester, VT, United States). In addition, ~150 distributed scalp points were digitized to aid  
205 in the co-registration with individual magnetic resonance images (MRIs).

206           T1- and T2-weighted 3D spin-echo MRI images were collected with a 1.5 T  
207 scanner (GoldSeal Signa HDxt, General Electric, Milwaukee, WI, USA) using a standard head  
208 coil and with the following parameters: TR/TE = 540/10 ms, flip angle = 90°, matrix size = 256  
209 x 256, slice thickness = 1.2 mm, sagittal orientation.

210

211

212

213 *Behavioral assessment*

214

215 Cognitive skills were tested on a separate visit. The behavioral tests included subtests of  
216 Wechsler Intelligence Scales for Children Third edition (Wechsler, 1991) or Wechsler Adult  
217 Intelligence Scale and the Stop Signal Task (SST) from the Cambridge Neuropsychological  
218 Automated Test Battery (CANTAB). Of the Wechsler Intelligence scale, the following  
219 subtests were administered: Similarities, Block Design, Digit Span, Coding and symbol  
220 search.

221           The similarities test is designed to assess verbal reasoning and the development  
222 of concepts. The block design subtest is designed to assess an individual's ability to  
223 understand complex visual information. Digit span (backward/forward) is designed to  
224 measure verbal short-term memory and attention. The coding test is designed to measure  
225 speed of processing but is also affected by other cognitive abilities such as learning, short-  
226 term memory and concentration. Finally, the symbol search test is designed to measure  
227 processing speed but is also affected by other cognitive abilities such as visuomotor  
228 coordination and concentration.

229           In the SST, the participant must respond to an arrow stimulus by selecting one of  
230 two options depending on the direction in which the arrow points. The test consists of two  
231 parts: in the first part, the participant is first introduced to the test and told to press the left-hand  
232 button when they see a left-pointing arrow and the right-hand button when they see a right-  
233 pointing arrow. There is one block of 16 trials for the participant to practice this. In the second  
234 part, the participant is told to continue pressing the buttons when they see the arrows, but if  
235 they hear an auditory signal (a beep), they should withhold their response and not press the  
236 button. The task uses a staircase design for the stop signal delay (SSD), allowing the task to

237 adapt to the performance of the participant, narrowing in on the 50% success rate for inhibition.

238 The test is designed to measure response inhibition/impulse control.

239

240 *Data analysis*

241

242 MEG data were first processed with the temporal signal space separation (tSSS) and movement  
243 compensation options, implemented in the MaxFilter™ program (version 3.0; MEGIN Oy,  
244 Helsinki, Finland), to suppress external interference and compensate for head movements  
245 (Taulu and Simola, 2006). The data were converted to the mean head position over the whole  
246 recording for each individual subject.

247 M/EEG data were analyzed using MNE-Python (version 0.17) (Gramfort et al.,  
248 2014; Gramfort et al, 2013). Continuous M/EEG recordings were low-pass filtered at 40 Hz,  
249 EEG data was re-referenced to the average over all EEG channels, and bad channels and data  
250 segments were identified and excluded. Epochs of  $-0.2$  to  $0.8$  s relative to stimulus onset were  
251 then extracted and corrected for the baseline ( $-0.2$  to  $0$ s) offset. Epochs were rejected for  
252 incorrect responses and large MEG signals ( $> 4$  pT/cm for gradiometers,  $> 5$  pT for  
253 magnetometers). Independent component analysis (ICA) was applied to suppress ocular and  
254 cardiac artifacts separately for MEG and EEG (Hyvärinen and Oja, 2000). Next, *autoreject*, an  
255 automatic data-driven algorithm, was used on the EEG data to repair or exclude bad epochs.  
256 We followed procedure introduced by Jas and colleagues (2017). If the algorithm excluded  
257 more than 20% of the epochs, manual artifact rejection of the EEG epochs was used instead.  
258 Finally, the data were manually checked for obvious artifacts, and the six experimental  
259 conditions were averaged separately.

260           The cortical surface for the source model was constructed from the individual  
261 structural MRI with the Freesurfer software (RRID: SCR\_001847, Martinos Center for  
262 Biomedical Imaging, <http://freesurfer.net>; Dale et al., 1999; Fischl et al., 1999; Fischl et al.,  
263 2001). The M/EEG source space was decimated at 4.9 mm spacing, resulting in ~5000 current  
264 locations per hemisphere.

265           The MEG and EEG data were registered to the structural data with MNE  
266 coregistration using the fiducial landmark locations, digitized EEG electrode locations and the  
267 additional scalp point. A forward solution for the source space was constructed using three-  
268 layer BEMs. Conductivity values used for the intracranial tissue (brain, CSF), skull and scalp  
269 were set to 0.3, 0.006 and 0.3 for adults and 0.33, 0.0132 and 0.33 for children, respectively.  
270 The noise covariance matrix was calculated from the individual epochs 200-ms pre-stimulus  
271 baseline, using a cross validation method implemented in MNE. In order to combine data from  
272 the MEG gradiometers, MEG magnetometers and EEG electrodes into a single inverse  
273 solution, the forward solution matrix and data were whitened using the covariance matrix  
274 (Engemann and Gramfort, 2015).

275           The source currents were examined using a cortically-constrained, depth-  
276 weighted ( $p = 0.8$ ) L2 minimum norm estimate (Hämäläinen and Ilmoniemi, 1994) with a loose  
277 orientation constraint (0.2). To determine the direction of the source currents, the source  
278 components normal to the cortical surface were extracted. The MNE solutions were constructed  
279 for each individual subject; source waveforms were computed as the mean value of the source  
280 element within region-of-interest (ROI) label 30 (transverse temporal gyrus) as defined by the  
281 Desikan-Killiany Atlas (Desikan et al., 2006). Amplitude values of the sustained response were  
282 calculated as an average over the 200-325ms time-window after stimulus presentation, which  
283 was determined by visual inspection of the grand averages (see Figure 2). Only negative

284 averages were included in the statistical analysis, as we assumed positive values would reflect  
285 cortical activity unrelated to our response of interest.

286

287 *Statistical analysis*

288

289 As shown in Figure 1 (colored cells in bottom table) we designed the experiment to separately  
290 compare the effects of Oddball vs Passive (to focus on attention) and Go/No-go vs Passive (to  
291 focus on inhibition). We used the deviant tones (DT) for the comparison between Passive and  
292 Go/No-go (GN) and the standard tones (ST) for the comparison between Passive and Oddball  
293 (OB). Crucially, for these comparisons the stimuli (ST or DT), probability (30% or 70%) and  
294 motor response (None) were identical and the amount of trials close to equal.

295 A multiple linear regression analysis was performed to test for main effects of  
296 age, hemisphere and task. Subsequently, a related samples Wilcoxon Signed-ranks test was  
297 used to explore and describe the effects in more detail, as the brain response distributions were  
298 heavily skewed (non-negative values were excluded).

299 Partial correlations (controlling for age) were calculated for behavioral  
300 performance measures and the 2x2 (hemi x task) auditory brain responses. We included the  
301 following behavioral performance measurements: mean reaction time (RT), intra-individual  
302 coefficient of variation (ICV; calculated as SDRT/mean RT), response accuracy (ERR;  
303 calculated as square root of error %) from tasks completed inside the scanner, and the stop-  
304 signal reaction time (SSRT), which was completed outside the scanner during the behavioral  
305 assessment.

306                   Linear regression analyses were performed with the behavioral performance  
307 measures as dependent variables. Age was entered first followed by the brain responses as  
308 independent variables. All variables in the linear regression model were selected based on the  
309 significant partial correlations. All statistical analyses were performed using SPSS statistics 25.

310                   Finally, a bivariate correlation was used to check whether the brain responses  
311 were related to any of the subtests of the Wechsler Intelligence Scales for Children (i.e. digit  
312 span, symbol coding, symbol search, block design or similarities) to see if we had to control  
313 for possible intelligence effects.

314

## 315 **Results**

316

### 317 **Descriptive statistics of cognitive skills and behavioral performance**

318 Descriptive statistics of the children's performance during the M/EEG experiment and their  
319 cognitive skills as per the behavioral assessment session are presented in Table 1.

320



321

**Table 1.** Mean, standard deviation (SD) and range of behavioral performance measures. Reaction times (RT), intra-individual coefficient of variation (ICV) and response accuracy (ERR) gathered from the Go/No-go task (GN) and the Oddball task (OB). Stop-signal reaction time (SSRT) was gathered from the stop-signal task during the behavioral assessment.

|                              | Children |       |           | Adults |       |           |
|------------------------------|----------|-------|-----------|--------|-------|-----------|
|                              | Mean     | SD    | Range     | Mean   | SD    | Range     |
| Age (years)                  | 10.17    | 1.44  | 6-14      | 24.78  | 3.38  | 20-30     |
| <b>M/EEG experiment</b>      |          |       |           |        |       |           |
| GN RT (ms)                   | 484.20   | 82.74 | 328-693   | 298.50 | 57.5  | 221-395   |
| GN ICV                       | 0.4      | 0.09  | 0.19-0.56 | 0.27   | 0.05  | 0.2-0.35  |
| GN ERR ( $\sqrt{\%}$ )       | 2.54     | 1     | 0.53-4.87 | 1.36   | 0.62  | 0-2.17    |
| OB RT (ms)                   | 480.67   | 82.03 | 234-728   | 303.69 | 53.85 | 214-420   |
| OB ICV                       | 0.38     | 0.11  | 0.18-0.82 | 0.21   | 0.04  | 0.14-0.32 |
| OB ERR ( $\sqrt{\%}$ )       | 1.78     | 0.85  | 0-3.87    | 0.7    | 0.36  | 0-1.18    |
| <b>Behavioral assessment</b> |          |       |           |        |       |           |
| SSRT (ms)                    | 205.94   | 56.20 | 87-351    | 140.81 | 32.62 | 80-198    |
| Digit span*                  | 10.55    | 2.65  | 5-17      | 18.06  | 2.89  | 14-26     |
| Symbol search*               | 12       | 2.58  | 5-18      | 36.50  | 7.84  | 19-46     |
| Coding*                      | 10.88    | 2.98  | 4-19      | 81.56  | 9.35  | 66-103    |
| Block design*                | 11.61    | 2.97  | 4-17      | 52.63  | 10.15 | 36-65     |
| Similarities*                | 10.39    | 2.63  | 2-16      | 28.38  | 3.2   | 24-35     |

\* standardized score for children, raw score for adults

322

### 323 **Developmental trajectory of the auditory evoked responses**

324 Figure 2 shows the measured neuromagnetic responses to the standard tones in the passive  
325 listening task at MEG sensor level (gradiometers). For visualization purposes, groups were  
326 separated by age (< 10 years old, > 10 years old and adults). The main activation in children is  
327 a sustained response pattern at around 250ms (N250m) in both hemispheres. The activation  
328 pattern of the older children in the earlier time window (~100ms) starts to resemble the adult  
329 activation pattern, but only in the right hemisphere. In contrast, the main activation in adults is  
330 evoked at around 100ms in both hemispheres.

331

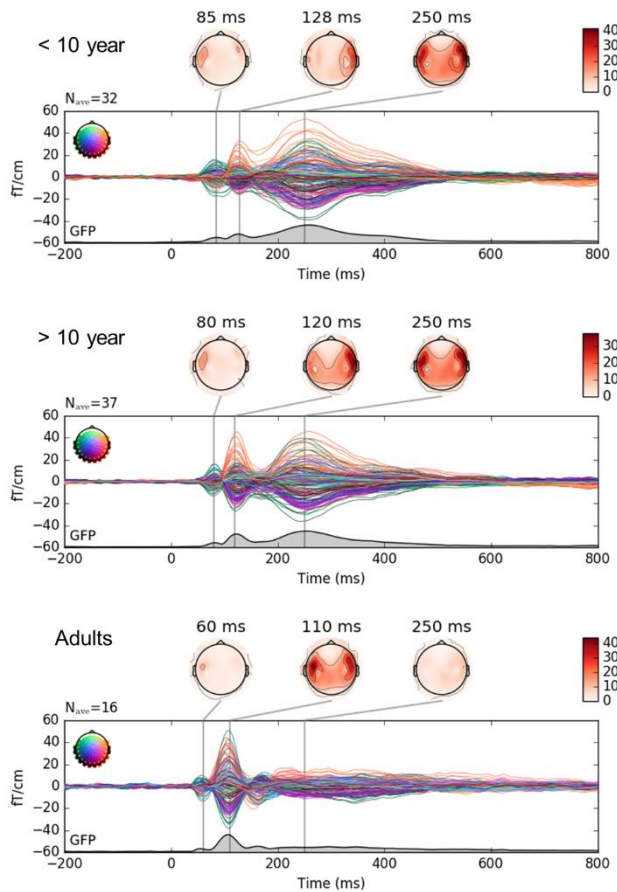

332

333 **Figure 2.** Developmental (age) differences in auditory brain responses to the passive listening (PL)  
334 standard tone (ST) as measured by the MEG gradiometers. Groups divided for illustration purposes  
335 between children younger than 10 (top), older than 10 (middle) and adults (bottom).

336

337 **Sustained response at ~250ms in auditory cortex is unique to the child activation pattern**

338 Figure 3 shows the evoked responses between groups in the left and right temporal channels

339 (gradiometers) with tasks overlaid. In general, the effects of age and task on the strength of

340 activation seem to appear in three separable time-windows: (i) transient activity at ~100ms, (ii)

341 a more sustained activation pattern between 200-300ms and (iii) prolonged activity between

342 400-800ms. From those three time-windows, the sustained activation pattern at ~250ms is

343 unique to children; the earlier activity at ~100ms is the main activation pattern in adults. The

344 later prolonged activity between 400-800ms shows a change between tasks, but not between  
345 age groups.

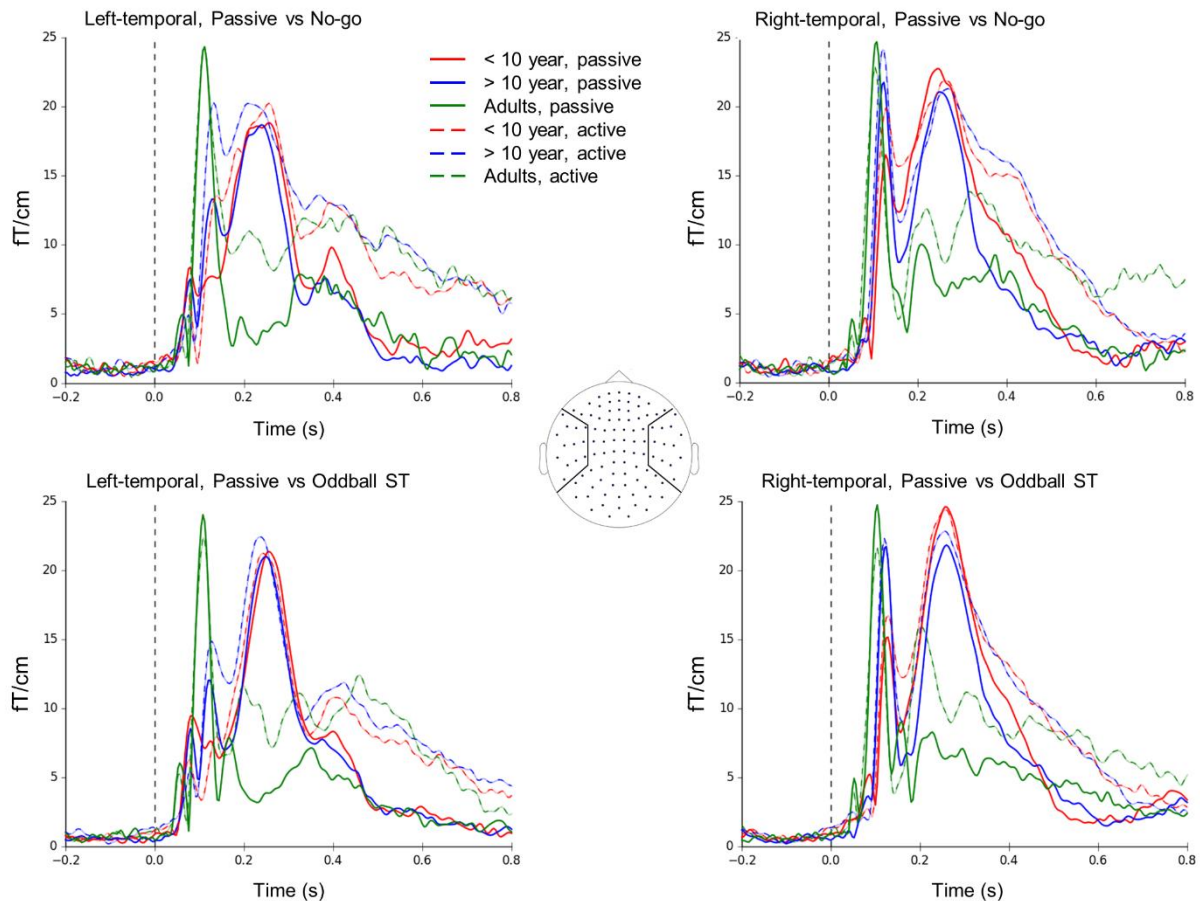

346 **Figure 3.** MEG Gradiometer sensor-level averaged auditory brain responses for the different  
347 conditions. Selected channels for the averages depicted in the center (left- and right-temporal  
348 gradiometers). Groups divided between < 10-year-old's (red), > 10-year-old's (blue) and adults (green).  
349 Top figures depict the passive (solid lines) and No-go (dotted lines) averages in the left and right  
350 hemisphere. Bottom figures depict the passive (solid lines) and oddball standard tone (ST) (dotted lines)  
351 averages in the left and right hemisphere.

352

353 The maximum activation in children, emerging around 250ms appears to be  
354 similar across tasks including passive listening. In contrast, adults do not show a similar  
355 response in the auditory cortex in any of the tasks. Indeed, combined M/EEG source  
356 localization of the responses show marked differences between adults and children (figure 4).  
357 The peaks in the child waveform are all localized in the temporal regions irrespective of task.

358 In contrast, the source localization in adults depends on stage of processing: the early peak at  
359 100ms reflects activation in the temporal regions and the later activation ~200-300ms reflects  
360 activation in the medial regions of the cerebral cortex (e.g. cingulate cortex). As the responses  
361 in children vs. adults in the 250-ms time-window reflect activation of different brain regions,  
362 their strength is not directly comparable. Moreover, the response pattern at ~250ms in the  
363 auditory cortex looks to be unique to the child brain (figure 4&5). Therefore, we did not directly  
364 contrast adults and children for this activation pattern. In the statistical analysis we focused on  
365 the strength of activation around ~250ms after stimulus presentation in children's transverse  
366 temporal gyrus. As per our experimental design, we discuss the PL vs GN and PL vs OB  
367 separately (see methods and figure 1).

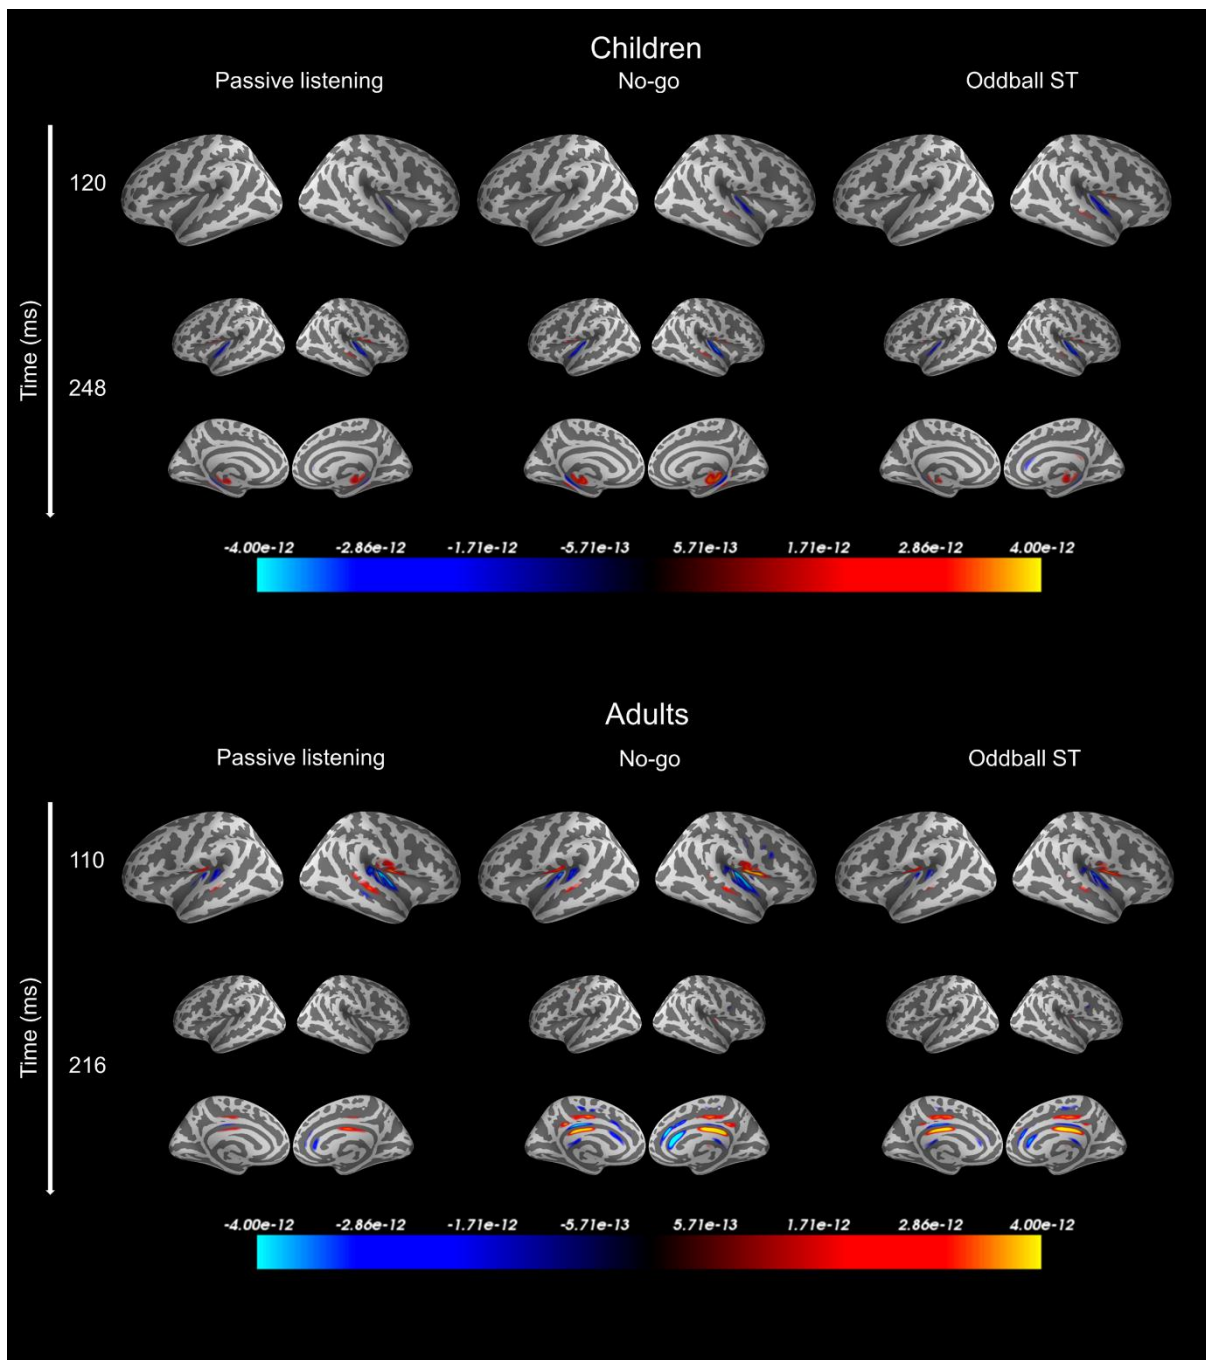

368 **Figure 4.** Grand average 3D visualization of the M/EEG combined source estimates for all  
369 children (top) and adults (bottom). 3D-plots presented for the two most prominent time-  
370 windows of activation in children (120ms and 248ms) and adults (110ms and 216ms).  
371 Conditions separated from left to right: Passive listening (standard tone(ST)), No-go (deviant  
372 tone) and Oddball (ST).

373

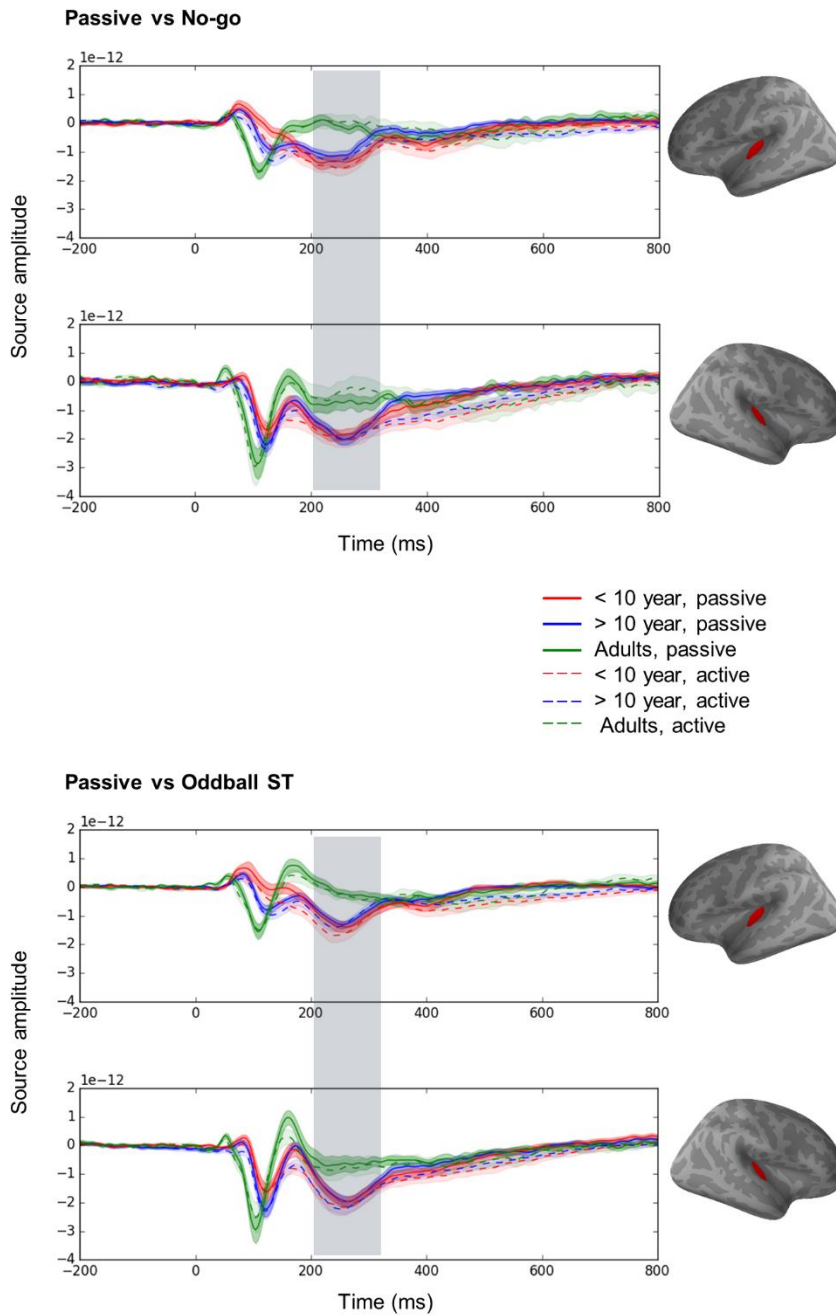

374

375 **Figure 5.** M/EEG combined Source estimates in the left and right transverse temporal gyrus (red area).  
376 Waveforms are an average of the entire area. Groups divided between < 10-year-old's (red), > 10-year-  
377 old's (blue) and adults (green). Top two figures depict the passive (solid lines) and attention (oddball  
378 standard tone) (dotted lines) waveforms in the left (top) and right (bottom) hemisphere. Bottom two  
379 figures depict the passive (solid lines) and inhibition (No-go deviant tone) (dotted lines) waveforms in  
380 the left (top) and right (bottom) hemisphere. Shaded areas around the waveform represent the standard  
381 error of the mean (SEM). Window is an approximation of the timepoints included in the calculation of  
382 the average.

383

384

385 **Passive vs Go/No-go task comparison**

386 ***Right hemisphere shows generally stronger activation at ~250ms independent of task***

387 The multiple linear regression model, as shown in Table 2 revealed that hemisphere, but not  
388 age or task, was a significant predictor of the strength of activation. The Wilcoxon Signed-  
389 ranks test showed stronger activation in the right compared to the left hemisphere in both the  
390 PL and GN task. In the PL task the activation strength was 32% stronger in the right ( $Mdn = -$   
391  $15.18$ ,  $IQR = [-8.85 - -21.81]$ ) compared to the left hemisphere ( $Mdn = -10$ ,  $IQR = [-5.35 - -$   
392  $13.6]$ ),  $Z = -3.39$ ,  $p = .001$ . Similarly, in the GN task the activation strength was 26% stronger  
393 in the right ( $Mdn = -16.82$ ,  $IQR = [-9.57 - -24.18]$ ) compared to the left ( $Mdn = -11.29$ ,  $IQR =$   
394  $[-5.6 - -17.58]$ ) hemisphere,  $Z = -3.35$ ,  $p = .001$ .

395

396 **Table 2.** Multiple linear regression analysis using hemisphere, task and age as predictors of the brain  
397 responses at ~250ms.

398

|                   | <i>B</i> | <i>SE B</i> | Standardized<br>beta | $\Delta R^2$ |
|-------------------|----------|-------------|----------------------|--------------|
| <b>Step 1</b>     |          |             |                      |              |
| <b>Constant</b>   | -27.80   | 4.96        |                      |              |
| <b>Hemisphere</b> | 4.82     | 1.19        | 0.25*                | 0.08         |
| <b>Task</b>       | -1.18    | 1.19        | -0.06                | ns           |
| <b>Age</b>        | 0.77     | 0.42        | 0.11                 | ns           |

403 *Note:*  $B =$  Unstandardized beta,  $SE B =$  standard error for the unstandardized beta,  $\Delta R^2 = R^2$  change.  $*p <$   
404  $0.05$ .

405

406 There was no significant effect of task on the activation strength. In general, the GN  
407 task showed non-significant stronger activation compared to the PL task. In the left hemisphere  
408 there was 13% stronger activation in the GN task ( $Mdn = -11.29$ ,  $IQR = [-5.6 - -17.58]$ )  
409 compared to the PL task ( $Mdn = -10$ ,  $IQR = [-5.35 - -13.6]$ ),  $Z = -1.67$ ,  $p = .095$ . In the right  
410 hemisphere, responses were 5% stronger in the GN task ( $Mdn = -16.82$ ,  $IQR = [-9.57 - -24.18]$ )  
411 compared to the PL task ( $Mdn = -15.18$ ,  $IQR = [-8.85 - -21.81]$ ),  $Z = -0.82$ ,  $p = .415$ .

412 Figure 6 shows the individual data points used the analysis as well as the average (line)  
413 and standard deviation (bar) for each condition.

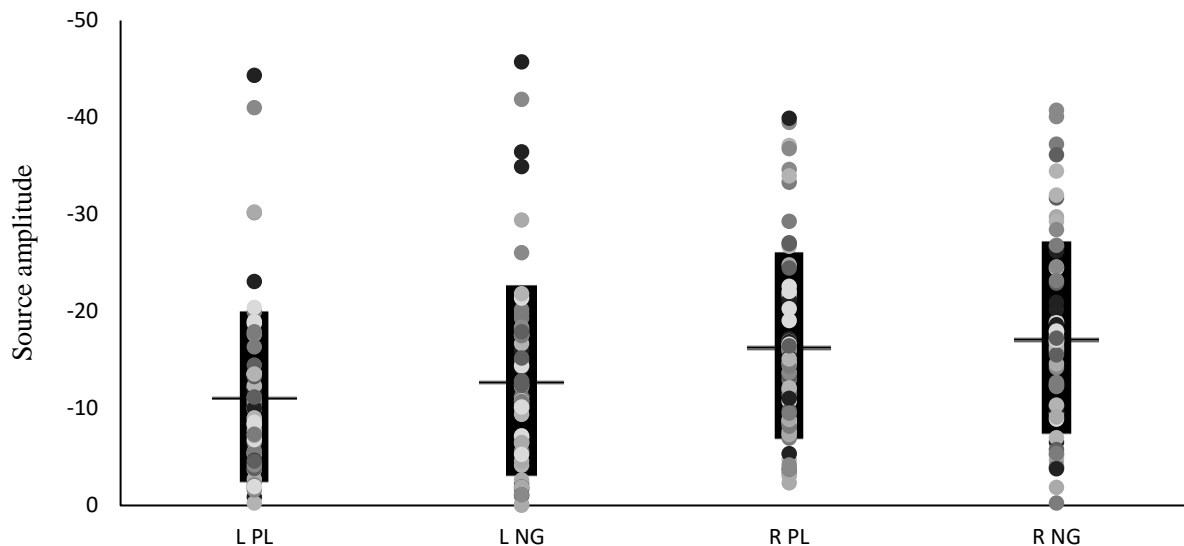

414 **Figure 6.** Individual data points (dots), average (horizontal line) and standard deviation (black bar) for  
415 the conditions: passive listening (PL) deviant tone and No-go (NG) deviant tone in the left (L) and right  
416 (R) hemisphere.

417

418 *Left hemisphere auditory responses at ~250ms predicts behavioral performance on*  
419 *inhibition tasks*

420 A correlation analysis did not reveal any relationships between the brain responses and the  
421 subtests of the Wechsler Intelligence Scales for Children. As such, no control for general  
422 intelligence was added to the partial correlation analysis. Table 3 shows the result of a  
423 bootstrapped (10,000 samples) partial correlation (controlled for age) which revealed  
424 significant positive correlations between amplitudes in the left hemisphere (irrespective of task)  
425 and performance measures on both the Go/No-go (MEG inhibition task) and the SSRT (during  
426 behavioral assessment). Stronger left-hemisphere activation was related to lower intra-  
427 individual variability (ICV) in reaction times, lower error rate (ERR) and smaller stop-signal  
428 reaction times (SSRT).



429 More specifically, in the PL task, a stronger left-hemisphere response amplitude  
430 was related to decreased ICV ( $r = .479$ , 95%CI = [.195 - .661],  $p = .000$ ) and SSRT ( $r = .331$ ,  
431 95%CI = [.113 - .543],  $p = .02$  and ERR ( $r = .314$ , 95%CI = [-.026 – .553],  $p = 0.028$ ). Similarly,  
432 in the GN task, a stronger left-hemisphere response amplitude to the No-go tone was related to  
433 decreased ICV ( $r = .467$ , 95%CI = [.185 - .685],  $p = .001$ ), decreased ERR ( $r = .343$ , 95%CI  
434 = [.022 - .587],  $p = 0.016$ ), and decreased SSRT ( $r = .292$ , 95%CI = [.022 - .533],  $p = 0.041$ ).

435

436 **Table 3.** Bootstrapped (10,000 samples) partial correlation (controlled for age) between de brain  
437 responses and behavioral performance measures. Significant correlations marked in bold.

|                 | RT     | ICV            | ERR           | SSRT          |
|-----------------|--------|----------------|---------------|---------------|
| 438 <b>L PL</b> | -0.024 | <b>0.479**</b> | <b>0.314*</b> | <b>0.331*</b> |
| 439 <b>R PL</b> | 0.157  | -0.033         | 0.037         | 0.162         |
| 440 <b>L GN</b> | -0.019 | <b>0.467**</b> | <b>0.343*</b> | <b>0.292*</b> |
| 441 <b>R GN</b> | 0.035  | 0.077          | 0.036         | 0.231         |

442 *Note: RT = reaction time, ICV = intra-individual coefficient of variability, ERR = response accuracy,*  
443 *SSRT = stop signal reaction time. \* $p < 0.05$ , \*\* $p < 0.01$ .*

444

445 Subsequently, linear regressions were used to predict the performance measures  
446 using age and the selected brain responses. The brain responses to different tasks in the same  
447 hemisphere were highly correlated, and there was no significant effect of task, so we used the  
448 brain responses measured during the Go/No-go. As shown in Table 4, the amplitude of the  
449 auditory response in the left hemisphere (to No-go tone) was a significant predictor of intra-  
450 individual variability of reaction time, error rate and stop-signal reaction time. Figure 7 shows  
451 the corresponding scatterplots.

452

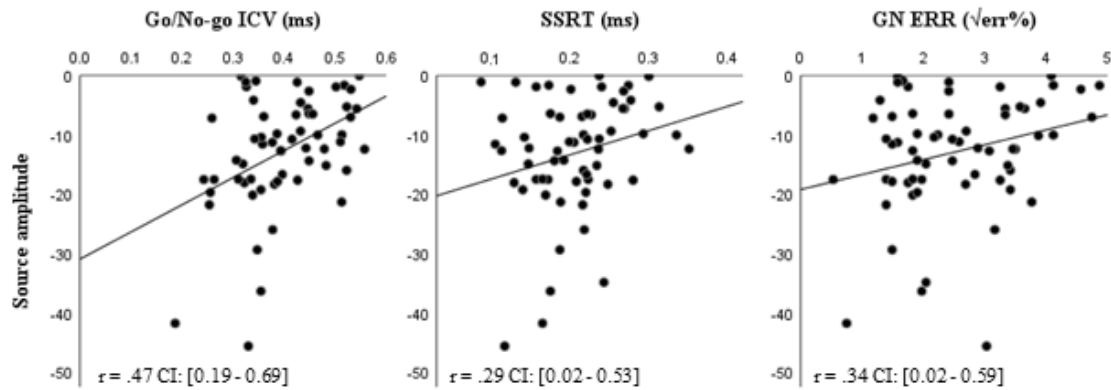

453

454 **Figure 7.** Scatterplots of the responses at ~250ms to the No-go tone and the behavioral performance  
 455 measures: intraindividual coefficient of variability (ICV; left), stop-signal reaction time (SSRT;  
 456 middle), and response accuracy (right).

457

458 **Table 4.** Linear regression analysis using the behavioral performance measures as the dependent  
 459 variable, age was entered first in the model, followed by the auditory responses in the left hemisphere  
 460 to the No-go tone as the predictors.

| Performance measure | Step                | Standardized Beta | $\Delta R^2$   |
|---------------------|---------------------|-------------------|----------------|
| ICV                 | 1. Age              | -0.248            | 0.036          |
|                     | 2. Left auditory NG | 0.459             | <b>0.207**</b> |
| ERR                 | 1. age              | -0.319            | <b>0.078*</b>  |
|                     | 2. Left auditory NG | 0.304             | <b>0.091*</b>  |
| SSRT                | 1. age              | -0.438            | <b>0.160**</b> |
|                     | 2. Left auditory NG | 0.295             | <b>0.086*</b>  |

466 *Note: ICV = intra-individual coefficient of variability, ERR = response accuracy, SSRT = stop signal*  
 467 *reaction time. \* $p < 0.05$ , \*\* $p < 0.01$  significance of  $R^2$  change.*

468

469

#### 470 **Passive vs Oddball task comparison**

471 ***Right hemisphere shows generally stronger activation at ~250ms independent of task***

472 Similar to the PL vs. GN comparison, the multiple linear regression model revealed that  
 473 hemisphere, but not age or task, was a significant predictor of the strength of activation (see

474 Table 5). The Wilcoxon Signed-ranks test showed significant stronger activation in the right  
 475 compared to the left hemisphere in both the PL and OB task. The hemisphere effect was similar  
 476 between tasks, with activation strength 29% stronger in the right ( $Mdn = -15.19$ ,  $IQR = [-8.63$   
 477  $- -21.76]$ ) compared to the left hemisphere ( $Mdn = -10.15$ ,  $IQR = [-6.04 - -15.67]$ ) in the PL  
 478 task,  $Z = -3.329$ ,  $p = .001$ , and 31% stronger in the right ( $Mdn = -18.27$ ,  $IQR = [-10.4 - -22.56]$ )  
 479 compared to the left hemisphere ( $Mdn = -10.82$ ,  $IQR = [-6.8 - -16.11]$ ) in the OB task,  $Z = -$   
 480  $4.24$ ,  $p = .000$ .

481

482 **Table 5.** Multiple linear regression analysis using hemisphere, task and age as predictors of the brain  
 483 responses at ~250ms.

484

|                     | <i>B</i> | <i>SE B</i> | Standardized<br>beta | $\Delta R^2$ |
|---------------------|----------|-------------|----------------------|--------------|
| <b>Step 1</b>       |          |             |                      |              |
| 485 <b>Constant</b> | -26.77   | 4.33        |                      |              |
| <b>Hemisphere</b>   | 5.12     | 1.08        | 0.29*                | 0.1          |
| 486 <b>Task</b>     | -0.69    | 0.58        | -0.08                | ns           |
| <b>Age</b>          | 0.6      | 0.38        | 0.09                 | ns           |

487 Note: *B* = Unstandardized beta, *SE B* = standard error for the unstandardized beta,  $\Delta R^2$  =  $R^2$  change. \* $p <$   
 488  $0.05$ .

489

490 There was no significant effect of task. In the left hemisphere, activation strength was  
 491 8% stronger in the OB task ( $Mdn = -10.82$ ,  $IQR = [-6.8 - -16.11]$ ) compared to the PL task  
 492 ( $Mdn = -10.15$ ,  $IQR = [-6.04 - -15.67]$ ),  $Z = -1.56$ ,  $p = 0.119$ . In the right hemisphere, activation  
 493 strength was 11% stronger in the OB ( $Mdn = -18.27$ ,  $IQR = [-10.4 - -22.56]$ ) compared to the  
 494 PL task ( $Mdn = -15.19$ ,  $IQR = [-8.63 - -21.76]$ ),  $Z = -3.42$ ,  $p = .001$ .

495 Figure 8 shows the individual data points used the analysis as well as the average  
 496 (line) and standard deviation (bar) for each condition.

497

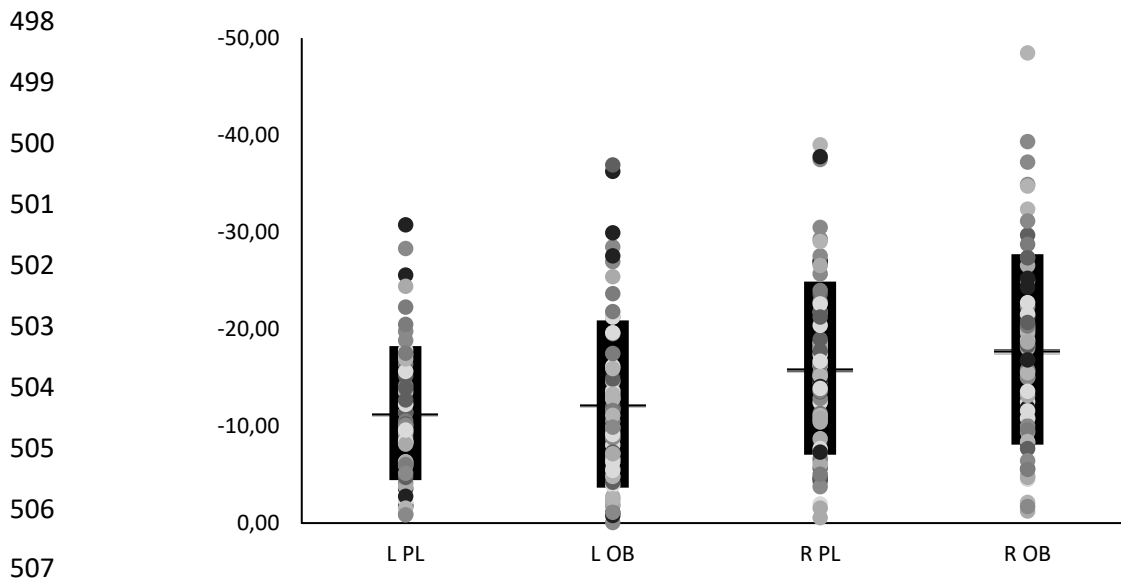

508 **Figure 8.** Individual data points (dots), average (horizontal line) and standard deviation (black bar) for  
509 the conditions: passive listening (PL) standard tone and oddball (OB) standard tone in the left (L) and  
510 right (R) hemisphere.

511

### 512 *Left hemisphere auditory responses at ~250ms predicts stop-signal reaction time*

513 A correlation analysis showed no consistent relationships between the brain responses and the  
514 subtests of the Wechsler Intelligence Scales for Children; PL standard tone in the right  
515 hemisphere correlated with symbol search score ( $r = .261$ ,  $p = .03$ ) and the PL standard tone in  
516 the left hemisphere correlated with coding score ( $r = -.259$ ,  $p = .04$ ). No control for general  
517 intelligence was added to the partial correlation analysis. Table 6 shows the result of a  
518 bootstrapped (10.000 samples) partial correlation (controlled for age) revealed significant  
519 positive correlations between amplitudes in left hemisphere during the OB task and SSRT.  
520 Stronger activation in the left hemisphere during the OB task were related to smaller SSRT's  
521 ( $r = 0.355$ , 95%CI = [0.142 – 0.560],  $p = 0.008$ ).

522

523

524 **Table 6.** Bootstrapped (10,000 samples) partial correlation (controlled for age) between de brain  
525 responses and behavioral performance measures. Significant correlations marked in bold.

|     | <b>RT</b>   | <b>ICV</b> | <b>ERR</b> | <b>SSRT</b> |                |
|-----|-------------|------------|------------|-------------|----------------|
| 526 | <b>L PL</b> | -0.153     | 0.252      | 0.194       | 0.251          |
|     | <b>R PL</b> | 0.087      | 0.042      | 0.025       | 0.224          |
| 527 | <b>L OB</b> | 0.033      | 0.234      | 0.230       | <b>0.355**</b> |
|     | <b>R OB</b> | 0.143      | 0.086      | 0.028       | 0.238          |

528 *Note: RT = reaction time, ICV = intra-individual coefficient of variability, ERR = response accuracy,*  
529 *SSRT = stop signal reaction time. \* $p < 0.05$ , \*\* $p < 0.01$ .*

530

531 As shown in Table 7, the linear regression model revealed that the strength of the  
532 auditory response in the oddball task was a significant predictor of the SSRT ( $p = 0.019$ ).

533

534 **Table 7.** Linear regression analysis using the behavioral performance measures as the dependent  
535 variable, age was entered first in the model, followed by the auditory responses in the left hemisphere  
536 to the No-go tone as the predictors.

| <b>Performance measure</b> | <b>Step</b>         | <b>Standardized Beta</b> | <b><math>\Delta R^2</math></b> |
|----------------------------|---------------------|--------------------------|--------------------------------|
| 537<br>538<br>539          | 1. age              | -0.469                   | <b>0.160**</b>                 |
|                            | 2. Left auditory OB | 0.282                    | <b>0.075*</b>                  |

540 *Note: SSRT = stop signal reaction time. \* $p < 0.05$ , \*\* $p < 0.01$  significance of  $R^2$  change.*

541

## 542 **Discussion**

543 In this study we assessed the developmental trajectory and functional significance of a robust,  
544 obligatory and sustained response pattern at ~250ms (N250m). Our data demonstrate that this  
545 activation pattern is uniquely prominent in the child brain; adults show an activation pattern in  
546 this time-window only in the active tasks and in different brain regions than children (i.e.  
547 medial regions of the cerebral cortex vs. auditory cortex, respectively). Surprisingly, and  
548 contrary to some earlier studies, age did not seem to affect the strength of activation in this  
549 time window. Perhaps this suggests a non-linear decrease during development of this auditory  
550 response with age, as it is absent in adults. This was also indicated by previous studies with a

551 wider age range than the present study, which found an initial increase in activation strength  
552 until children reached the age of 11, after which a gradual decrease was reported (Ponton et al.,  
553 2000; Ponton et al., 2002). In the present study, the strength of activation in children in this  
554 time-window was unaffected by task demands, but the strength of activation in the left  
555 hemisphere was associated with superior performance on inhibition tasks and measures of  
556 cognitive control.

557           Our results confirm that (i) the N250m does not reflect a delayed adult N1m, nor  
558 does it correspond to the activation around 200ms in adults in active tasks (N2m) but instead  
559 is a developmentally specific auditory evoked brain response (Albrecht et al., 2000; Ponton et  
560 al., 2000, 2002; Takeshita et al., 2002; Parviainen et al., 2011; Parviainen et al., 2019) and that  
561 (ii) this sustained response pattern is part of general and automatic, circuit level, processing in  
562 auditory areas of the child brain (Parviainen et al., 2019). We expand on these findings by  
563 illuminating its functional significance for cognitive skills.

564           The strength of the sustained response in the left, but not right, hemisphere was  
565 most consistently associated with performance on inhibition tasks. Left-hemisphere response  
566 strength explained 20.7%, 9.1% and 8.6% of unique variance of the ICV, response accuracy  
567 and SSRT respectively. We focus on the ICV and the sustained response during No-go trials,  
568 as the other results are likely different, less sensitive, measures of the same effect (i.e. one  
569 underlying effect is the most parsimonious explanation of our results).

570           The ICV reflects temporal variation in cognitive performance and it has been  
571 extensively studied in attention-deficit/hyperactivity disorder (ADHD) (de Zeeuw et al., 2008;  
572 van Belle et al., 2015). Intrasubject variability has long ago been put forward as an  
573 endophenotype of ADHD, the characteristic lapses of intention and attention in ADHD are  
574 thought to be a result of deficits in temporal processing that result in higher intrasubject

575 intertrial variability (Castellanos and Tannock, 2002). Importantly, the auditory cortex  
576 coordinates activity with intricate timing. Indeed, the evoked responses reflect the auditory  
577 system's ability to consistently respond with the same timing to each stimulus presentation.  
578 The behavioral importance of temporal processes is further supported by our and other studies'  
579 finding that ICV is a much better predictor of inhibitory success (% successful inhibition) ( $r =$   
580  $.740$ ) than traditional measures of reaction time ( $r = -.076$ ) (Bellegrove et al., 2004; de Zeeuw  
581 et al., 2008, van Belle et al., 2015). Combined, these results suggest that ICV is an important  
582 measure of cognitive control that possibly relies on the auditory cortex's ability to consistently  
583 respond to the presented stimulus.

584           Our results indicate that the brain mechanisms that, in auditory based tasks, help  
585 achieve a consistent performance is remarkably different between children and adults. Most  
586 notably, the No-go activation in the 200-325ms time-window shows clear differences: whereas  
587 the adult major activation peak was localized to the medial regions of the cerebral cortex (e.g.  
588 cingulate cortex), children's strongest activation pattern was located in the auditory cortex.  
589 Importantly, our findings are in line with earlier fMRI study's and M/EEG studies in adults  
590 that emphasize the importance of both the 200-300 time-window and the cingulate cortex in  
591 inhibition and cognitive control (Nieuwenhuis et al., 2003; Huster et al., 2010; Falkenstein et  
592 al., 1999; Smith et al., 2007; Botvinick et al., 2004; Chambers et al., 2009). In contrast to the  
593 mature brain, our data show that children rely strongly on activation in the auditory cortex  
594 during the 200-300 time-window, independent of task demands.

595           Our results further suggest that the amplitude waveforms during auditory  
596 inhibition tasks (e.g. Go/No-go or SST) in children and adults are incomparable. This is  
597 relevant especially for EEG studies with limited spatial sensitivity; electrical potentials  
598 originating in the auditory cortices summate at the vertex, generating one maximum on the  
599 head surface (Hari and Puce, 2017). Consequently, even though the main current source

600 underlying the measured signal is different between adults and children, typical EEG-ERP  
601 analysis will have limited capacity to reveal this difference, and may also erroneously transfer  
602 spatial differences into amplitude effects. Taken together, these results suggest that in order to  
603 move forward in understanding the neurodevelopmental underpinnings of improvement in  
604 cognitive skills (or problems therein), we need to adopt a more comprehensive approach in  
605 analysis incorporating both temporal and spatial characteristics of activation.

606           Our claim that children and adults employ different neural mechanisms to  
607 achieve a consistent performance is in line with previous fMRI studies. In adults, both reduced  
608 response variability and improved top-down cognitive control have been directly related to  
609 greater anterior cingulate gyrus (ACG) activity (Bellgrove et al., 2004; van Belle et al., 2015)  
610 and focal damage to the frontal lobes impairs the stability of cognitive performance (Stuss et  
611 al., 2003). In one fMRI study, younger subjects (7-15 years) showed differences from older  
612 subjects (15-24 years) in the relationship between dorsal ACG activity and response variability:  
613 in older subjects increased dorsal ACG activity was related to a reduction in response  
614 variability, whereas in the younger group dorsal ACG activity did not relate to this measure of  
615 cognitive control (van Belle et al., 2015). Intriguingly, Simmonds and colleagues (2007)  
616 reported that, in typically developing children (8-12 years), instead of cingulate activity, lower  
617 variability was associated with activation in the rostral supplementary motor area (pre-SMA)  
618 in a Go/No-go task.

619           The exact neurobiological underpinnings that underlie this difference between  
620 adults and children are unclear and should be the subject of further investigation. Our results  
621 together with earlier findings indicate a shift from sensorimotor associations in the child brain  
622 to more emphasis on cognitive control processes in the adult brain. In the present study, the  
623 strength of the sustained response in children showed a positive correlation with inhibitory  
624 performance measures, and thus seems to aid the inhibitory performance in children. Similarly,



625 a recent study investigating the auditory no-go in non-human primates identified a sustained  
626 response in the auditory cortex to reflect sensorimotor representations important for behavioral  
627 inhibition (Huang et al., 2019).

628           Even though the right hemisphere shows stronger responses, the left hemisphere  
629 responses show the meaningful behavioral association in children. We surmise this relates to  
630 the different developmental trajectories of the auditory cortices. The left auditory cortex has  
631 been known to mature slower than the right (Paetau et al., 1995; Parviainen et al., 2019). In  
632 addition, auditory responses in the right-hemisphere has been more strongly linked with genetic  
633 regulation compared to the left-hemisphere (Renvall et al., 2012). This protracted development  
634 of the left hemisphere arguably provides a time window where the brain can flexibly employ  
635 its resources which should be useful in the everchanging environment of the child brain.  
636 Indeed, others have argued for stronger experience-driven plasticity in the left-hemisphere  
637 (Renvall et al., 2012; Parviainen et al., 2019). However, handedness has also been shown to  
638 affect hemispheric dominance of neuromagnetic responses to sounds (Kirveskari et al., 2006)  
639 and as such our reported effect might depend on handedness. An important remaining question  
640 is whether our reported relationship depends on the auditory cortex that is contralateral to the  
641 hand used to respond, or a mechanism unique to the left hemisphere.

642           A range of issues can impact the accuracy of M/EEG source reconstruction in  
643 children (e.g. head movements, distance to sensors, suboptimal cortical surface reconstruction  
644 and forward/inverse solutions and M/EEG-MRI co-registration errors). We conducted the  
645 experiment and analyzed the data following the generally accepted guidelines and detailed  
646 instructions (Gross et al., 2013; Jas et al., 2018). Furthermore, we combined M/EEG and  
647 individual MRI's in a relatively large sample of children, reducing the influence of possible  
648 irregular confounds. Although the benefits of combining MEG and EEG have been laid out

649 extensively (Sharon et al., 2007; Aydin et al., 2015; Baillet, 2017; Gross, 2019), its  
650 complementarity has been rarely used for theory development.

651           To conclude, we provide unique evidence that the child-specific auditory  
652 activation in the left-hemisphere at around 250ms is functionally meaningful for performance  
653 on inhibition tasks. We claim that the mechanisms underlying cognitive control are different  
654 in children and adults with more emphasis on sensorimotor associations in children.  
655 Interestingly, the association between activation strength and performance measures are  
656 limited to the left-hemisphere. We presume this reflects the experience-driven plasticity which  
657 is more strongly linked to the left-hemisphere.

658

## 659 **Acknowledgements**

660 We are grateful to Hanna-Maija Lapinkero, Suvi Karjalainen, Maria Vesterinen & Janne  
661 Rajaniemi for help with data collection and to Amit Jaiswal, Erkka Heinilä and Jukka Nenonen  
662 for their help with preprocessing and scripting. This work was supported by EU project  
663 ChildBrain (Horizon2020 Marie Skłodowska-Curie Action (MSCA) Innovative Training  
664 Network (ITN) – European Training Network (ETN), grant agreement no. 641652).

665 **References**

- 666 Albrecht, R., Suchodoletz, W. v, and Uwer, R. (2000). The development of auditory evoked  
667 dipole source activity from childhood to adulthood. *Clinical Neurophysiology*  
668 111, 2268–2276. doi: 10.1016/S1388-2457(00)00464-8
- 669 Aydin, Ü., Vorwerk, J., Dümpelmann, M., Küpper, P., Kugel, H., Heers, M., Wellmer, J.,  
670 Kellinghaus, C., Haueisen, J., Rampp, S. et al. (2015). Combined EEG/MEG  
671 can outperform single modality EEG or MEG source reconstruction in  
672 presurgical epilepsy diagnosis. *PloS one*, 10(3), e0118753. doi:  
673 10.1371/journal.pone.0118753
- 674 Baillet, S. (2017). Magnetoencephalography for brain electrophysiology and imaging. *Nature*  
675 *Neuroscience* 20, 327–339. doi: 10.1038/nn.4504
- 676 van Belle, J., van Raalten, T., Bos, D.J., Zandbelt, B.B., Oranje, B., and Durston, S. (2015).  
677 Capturing the dynamics of response variability in the brain in ADHD.  
678 *NeuroImage: Clinical* 7, 132–141. doi: 10.1016/j.nicl.2014.11.014
- 679 Bellgrove, M. A., Hester, R., and Garavan, H. (2004). The functional neuroanatomical  
680 correlates of response variability: evidence from a response inhibition  
681 task. *Neuropsychologia*, 42(14), 1910-1916. doi:  
682 10.1016/j.neuropsychologia.2004.05.007
- 683 van Bijnen, S., Kärkkäinen, S., Helenius, P., and Parviainen, T. (2019). Left hemisphere  
684 enhancement of auditory activation in language impaired children. *Scientific*  
685 *Reports* 9, 9087. doi: 10.1038/s41598-019-45597-y
- 686 Botvinick, M.M., Cohen, J.D., and Carter, C.S. (2004). Conflict monitoring and anterior  
687 cingulate cortex: an update. *Trends in Cognitive Sciences* 8, 539–546. doi:  
688 10.1016/j.tics.2004.10.003
- 689 Castellanos, F.X., and Tannock, R. (2002). Neuroscience of attention-deficit/hyperactivity

- 690 disorder: the search for endophenotypes. *Nat Rev Neurosci* 3, 617–628. doi:  
691 10.1038/nrn896
- 692 Čeponienė, R., Cheour, M., and Näätänen, R. (1998). Interstimulus interval and auditory  
693 event-related potentials in children: evidence for multiple generators.  
694 *Electroencephalography and Clinical Neurophysiology/Evoked Potentials*  
695 *Section*, 108(4), 345-354. doi: 10.1016/S0168-5597(97)00081-6
- 696 Čeponienė, R., Rinne, T., and Näätänen, R. (2002). Maturation of cortical sound processing  
697 as indexed by event-related potentials. *Clinical Neurophysiology* 113, 870–882.  
698 doi: 10.1016/S1388-2457(02)00078-0
- 699 Chambers, C.D., Garavan, H., and Bellgrove, M.A. (2009). Insights into the neural basis of  
700 response inhibition from cognitive and clinical neuroscience. *Neuroscience and*  
701 *Biobehavioral Reviews* 33, 631–646. doi: 10.1016/j.neubiorev.2008.08.016
- 702 Dale, A.M., Fischl, B., and Sereno, M.I. (1999). Cortical surface-based analysis I:  
703 segmentation and surface reconstruction. *Neuroimage*. 9:179–194. doi:  
704 10.1006/nimg.1998.0395
- 705 Desikan, R. S., Ségonne, F., Fischl, B., Quinn, B. T., Dickerson, B. C., Blacker, D., Buckner,  
706 R.L., Dale, A.M., Maguire, R.P et al., (2006). An automated labeling system for  
707 subdividing the human cerebral cortex on MRI scans into gyral based regions of  
708 interest. *Neuroimage*, 31(3), 968-980. doi: 10.1016/j.neuroimage.2006.01.021
- 709 Engemann, D. A., and Gramfort, A. (2015). Automated model selection in covariance  
710 estimation and spatial whitening of MEG and EEG signals. *NeuroImage*, 108,  
711 328-342. doi: 10.1016/j.neuroimage.2014.12.040
- 712 Falkenstein, M., Hoormann, J., and Hohnsbein, J. (1999). ERP components in Go/Nogo tasks  
713 and their relation to inhibition. *Acta psychologica*, 101(2-3), 267-291. doi:  
714 10.1016/S0001-6918(99)00008-6

- 715 Fischl B., Sereno M.I., and Dale, A.M. (1999a). Cortical surface-based analysis II: inflation,  
716 flattening, and a surface-based coordinate system. *Neuroimage*. 9:195–207. doi:
- 717 Fischl B., Sereno, M.I., Tootell, R.B., and Dale, A.M. (1999b). High-resolution intersubject  
718 averaging and a coordinate system for the cortical surface. *Hum. Brain Mapp.*  
719 8:272–284. doi: 10.1002/(SICI)1097-0193(1999)8:4<272::AID-  
720 HBM10>3.0.CO;2-4
- 721 Gordon, K.A., Papsin, B.C., and Harrison, R.V. (2003). Activity-Dependent Developmental  
722 Plasticity of the Auditory Brain Stem in Children Who Use Cochlear Implants.  
723 *Ear and Hearing* 24, 485–500. doi: 10.1097/01.AUD.0000100203.65990.D4
- 724 Gramfort, A., Luessi, M., Larson, E., Engemann, D. A., Strohmeier, D., Brodbeck, C.,  
725 Parkkonen, L., and Hämäläinen, M. (2013). MEG and EEG data analysis with  
726 MNE-Python. *Frontiers in neuroscience*, 7, 267. doi: 10.3389/fnins.2013.00267
- 727 Gramfort, A., Luessi, M., Larson, E., Engemann, D. A., Strohmeier, D., Brodbeck, C.,  
728 Parkkonen, L., and Hämäläinen, M. S. (2014). MNE software for processing  
729 MEG and EEG data. *Neuroimage*, 86, 446-460. doi:  
730 10.1016/j.neuroimage.2013.10.027
- 731 Gross, J., Baillet, S., Barnes, G. R., Henson, R. N., Hillebrand, A., Jensen, O., Jerbi, K.,  
732 Litvak., V., Maess, B., Oostenveld, R. et al. (2013). Good practice for  
733 conducting and reporting MEG research. *Neuroimage*, 65, 349-363. doi:  
734 10.1016/j.neuroimage.2012.10.001
- 735 Gross, J. (2019). *Magnetoencephalography in Cognitive Neuroscience: A*  
736 *Primer*. *Neuron*, 104(2), 189-204. doi: 10.1016/j.neuron.2019.07.001
- 737 Hämäläinen, J.A., Guttorm, T.K., Richardson, U., Alku, P., Lyytinen, H., and Leppänen,

- 738 P.H.T. (2013). Auditory Event-Related Potentials Measured in Kindergarten  
739 Predict Later Reading Problems at School Age. *Developmental*  
740 *Neuropsychology* 38, 550–566. doi: 10.1080/87565641.2012.718817:
- 741 Hämäläinen, M. S., and Ilmoniemi, R. J. (1994). Interpreting magnetic fields of the brain:  
742 minimum norm estimates. *Medical and biological engineering and*  
743 *computing*, 32(1), 35-42. doi: 10.1007/BF02512476
- 744 Hari, R., and Puce, A. (2017). *MEG-EEG Primer*. Oxford University Press.
- 745 Hillyard, S. A., Hink, R. F., Schwent, V. L., and Picton, T. W. (1973). Electrical signs of  
746 selective attention in the human brain. *Science*, 182(4108), 177-180. doi:  
747 10.1126/science.182.4108.177
- 748 Huang, Y., Heil, P., and Brosch, M. (2019). Associations between sounds and actions in early  
749 auditory cortex of nonhuman primates. *ELife* 8, e43281. doi:  
750 10.7554/eLife.43281
- 751 Huster, R.J., Westerhausen, R., Pantev, C., and Konrad, C. (2010). The role of the cingulate  
752 cortex as neural generator of the N200 and P300 in a tactile response inhibition  
753 task. *Human Brain Mapping* 31, 1260–1271. doi: 10.1002/hbm.20933
- 754 Hyvärinen, A., and Oja, E. (2000). Independent component analysis: algorithms and  
755 applications. *Neural networks*, 13(4-5), 411-430. doi: 10.1016/S0893-  
756 6080(00)00026-5
- 757 Jas, M., Engemann, D., Bekhti, Y., Raimondo, F., and Gramfort, A. (2017).  
758 Autoreject: Automated artifact rejection for MEG and EEG data. *NeuroImage*,  
759 159, 417-429. doi: 10.1016/j.neuroimage.2017.06.030
- 760 Jas, M., Larson, E., Engemann, D. A., Leppäkangas, J., Taulu, S., Hämäläinen, M., and

- 761 Gramfort, A. (2018). A reproducible MEG/EEG group study with the MNE  
762 software: recommendations, quality assessments, and good practices. *Frontiers*  
763 *in neuroscience*, 12. doi: 10.3389/fnins.2018.00530
- 764 Johnstone, S.J., Barry, R.J., Anderson, J.W., and Coyle, S.F. (1996). Age-related changes in  
765 child and adolescent event-related potential component morphology, amplitude  
766 and latency to standard and target stimuli in an auditory oddball task.  
767 *International Journal of Psychophysiology* 24, 223–238. doi: 10.1016/S0167-  
768 8760(96)00065-7
- 769 Karhu, J., Herrgård, E., Pääkkönen, A., Luoma, L., Airaksinen, E., and Partanen, J. (1997).  
770 Dual cerebral processing of elementary auditory input in children.  
771 *Neuroreport*, 8(6), 1327-1330.
- 772 Kirveskari, E., Salmelin, R., and Hari, R. (2006). Neuromagnetic responses to vowels vs.  
773 tones reveal hemispheric lateralization. *Clinical neurophysiology*, 117(3), 643-  
774 648. doi: 10.1016/j.clinph.2005.11.001
- 775 Kraus, N., and White-Schwoch, T. (2015). Unraveling the Biology of Auditory Learning: A  
776 Cognitive–Sensorimotor–Reward Framework. *Trends in Cognitive Sciences* 19,  
777 642–654. doi: 10.1016/j.tics.2015.08.017
- 778 Kraus, N., Strait, D.L., and Parbery-Clark, A. (2012). Cognitive factors shape brain networks  
779 for auditory skills: spotlight on auditory working memory. *Annals of the New*  
780 *York Academy of Sciences* 1252, 100–107. doi: 10.1111/j.1749-  
781 6632.2012.06463.x
- 782 Näätänen, R. (1982). Processing negativity: An evoked-potential reflection. *Psychological*  
783 *bulletin*, 92(3), 605. doi: 10.1037/0033-2909.92.3.605
- 784 Nieuwenhuis, S., Yeung, N., Van Den Wildenberg, W., and Ridderinkhof, K. R. (2003).

- 785 Electrophysiological correlates of anterior cingulate function in a go/no-go task:  
786 effects of response conflict and trial type frequency. *Cognitive, affective, and*  
787 *behavioral neuroscience*, 3(1), 17-26. doi: doi.org/10.3758/CABN.3.1.17
- 788 Orekhova, E.V., Butorina, A.V., Tsetlin, M.M., Novikova, S.I., Sokolov, P.A., Elam, M., and  
789 Stroganova, T.A. (2013). Auditory Magnetic Response to Clicks in Children  
790 and Adults: Its Components, Hemispheric Lateralization and Repetition  
791 Suppression Effect. *Brain Topogr* 26, 410–427. doi: 10.1007/s10548-012-0262-  
792 x
- 793 Paetau, R., Ahonen, A., Salonen, O., and Sams, M. (1995). Auditory evoked magnetic fields  
794 to tones and pseudowords in healthy children and adults. *Journal of Clinical*  
795 *Neurophysiology*, 12, 177–185. doi: 10.1097/00004691-199503000-00008
- 796 Parviainen, T., Helenius, P., Poskiparta, E., Niemi, P., and Salmelin, R. (2011). Speech  
797 perception in the child brain: Cortical timing and its relevance to literacy  
798 acquisition. *Human Brain Mapping* 32, 2193–2206. doi: 10.1002/hbm.21181
- 799 Parviainen, T., Helenius, P., and Salmelin, R. (2019) Children show hemispheric differences  
800 in the basic auditory response properties. *Human Brain Mapping*. doi:  
801 10.1002/hbm.24553
- 802 Peirce, J. W., Gray, J. R., Simpson, S., MacAskill, M. R., Höchenberger, R., Sogo, H.,  
803 Kastman, E., Lindeløv, J. (2019). PsychoPy2: experiments in behavior made  
804 easy. *Behavior Research Methods*. doi: 10.3758/s13428-018-01193-y
- 805 Ponton, C., Eggermont, J.J., Khosla, D., Kwong, B., and Don, M. (2002). Maturation of  
806 human central auditory system activity: separating auditory evoked potentials  
807 by dipole source modeling. *Clinical Neurophysiology* 113, 407–420. doi:  
808 10.1016/S1388-2457(01)00733-7
- 809 Ponton, C.W., Eggermont, J.J., Kwong, B., and Don, M. (2000). Maturation of human central



- 810 auditory system activity: evidence from multi-channel evoked potentials.  
811 *Clinical Neurophysiology* 111, 220–236. doi: 10.1016/S1388-2457(99)00236-9
- 812 Renvall, H., Salmela, E., Vihla, M., Illman, M., Leinonen, E., Kere, J., and Salmelin, R.  
813 (2012). Genome-wide linkage analysis of human auditory cortical activation  
814 suggests distinct loci on chromosomes 2, 3, and 8. *Journal of*  
815 *Neuroscience*, 32(42), 14511-14518. doi: 10.1523/JNEUROSCI.1483-12.2012
- 816 Sharma, A., Dorman, M.F., and Spahr, A.J. (2002). A sensitive period for the development of  
817 the central auditory system in children with cochlear implants: implications for  
818 age of implantation. *Ear and Hearing* 23, 532–539. doi:  
819 10.1097/01.AUD.0000042223.62381.01
- 820 Sharon, D., Hämäläinen, M.S., Tootell, R.B.H., Halgren, E., and Belliveau, J.W. (2007). The  
821 advantage of combining MEG and EEG: Comparison to fMRI in focally  
822 stimulated visual cortex. *NeuroImage* 36, 1225–1235. doi:  
823 10.1016/j.neuroimage.2007.03.066
- 824 Simmonds, D.J., Fotedar, S.G., Suskauer, S.J., Pekar, J.J., Denckla, M.B., and Mostofsky,  
825 S.H. (2007). Functional brain correlates of response time variability in children.  
826 *Neuropsychologia* 45, 2147–2157. doi:  
827 10.1016/j.neuropsychologia.2007.01.013
- 828 Smith, J.L., Johnstone, S.J., and Barry, R.J. (2007). Response priming in the Go/NoGo task:  
829 the N2 reflects neither inhibition nor conflict. *Clin Neurophysiol* 118, 343–355.  
830 doi: 10.1016/j.clinph.2006.09.027
- 831 Stuss, D. T., Murphy, K. J., Binns, M. A., and Alexander, M. P. (2003). Staying on the job:  
832 the frontal lobes control individual performance variability. *Brain*, 126(11),  
833 2363-2380. doi: 10.1093/brain/awg237
- 834 Takeshita, K., Nagamine, T., Thuy, D.H.D., Satow, T., Matsushashi, M., Yamamoto, J.,

- 835 Takayama, M., Fujiwara, N., and Shibasaki, H. (2002). Maturation of  
836 parallel auditory processing in school-aged children revealed by simultaneous  
837 recording of magnetic and electric cortical responses. *Clin Neurophysiol* 113,  
838 1470–1484. doi: 10.1016/S1388-2457(02)00202-X
- 839 Taulu, S., and Simola, J. (2006). Spatiotemporal signal space separation method for rejecting  
840 nearby interference in MEG measurements. *Phys. Med. Biol.* 51, 1759. doi:  
841 10.1088/0031-9155/51/7/008
- 842 Tierney, A.T., Krizman, J., and Kraus, N. (2015). Music training alters the course of  
843 adolescent auditory development. *Proceedings of the National Academy of*  
844 *Sciences* 112, 10062–10067. doi: 10.1073/pnas.1505114112
- 845 Wunderlich, J.L., and Cone-Wesson, B.K. (2006). Maturation of CAEP in infants and  
846 children: A review. *Hearing Research* 212, 212–223. doi:  
847 10.1016/j.heares.2005.11.008
- 848 Yoshimura, Y., Kikuchi, M., Ueno, S., Shitamichi, K., Remijn, G.B., Hiraishi, H., Hasegawa,  
849 C., Furutani, N., Oi, M., Munesue, T., et al. (2014). A longitudinal study of  
850 auditory evoked field and language development in young children.  
851 *NeuroImage* 101, 440–447. doi: 10.1016/j.neuroimage.2014.07.034
- 852 de Zeeuw, P.D., Aarnoudse-Moens, C., Bijlhout, J., König, C., Uiterweer, A.P., Papanikolaou,  
853 A., Hoogenraad, C., Imandt, L., Been, D.D., Sergeant, J.A., et al. (2008).  
854 Inhibitory Performance, Response Speed, Intraindividual Variability, and  
855 Response Accuracy in ADHD. *Journal of the American Academy of Child and*  
856 *Adolescent Psychiatry* 47, 808–816. doi: 10.1097/CHI.0b013e318172eee9
